# Supplementary material for: The Putative APSES Transcription Factor RgdA Governs Growth, Development, Toxigenesis, and Virulence in Aspergillus fumigatus
Source: PubMed Central journal article supplement (PMC7657592; doi:10.1128/msphere.00998-20), 2020-11-11

*ΔrgdA* vs WT

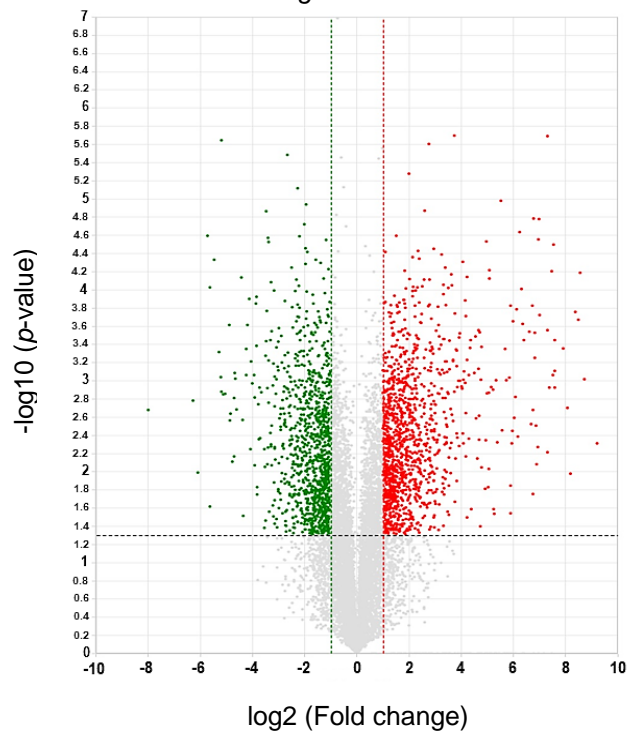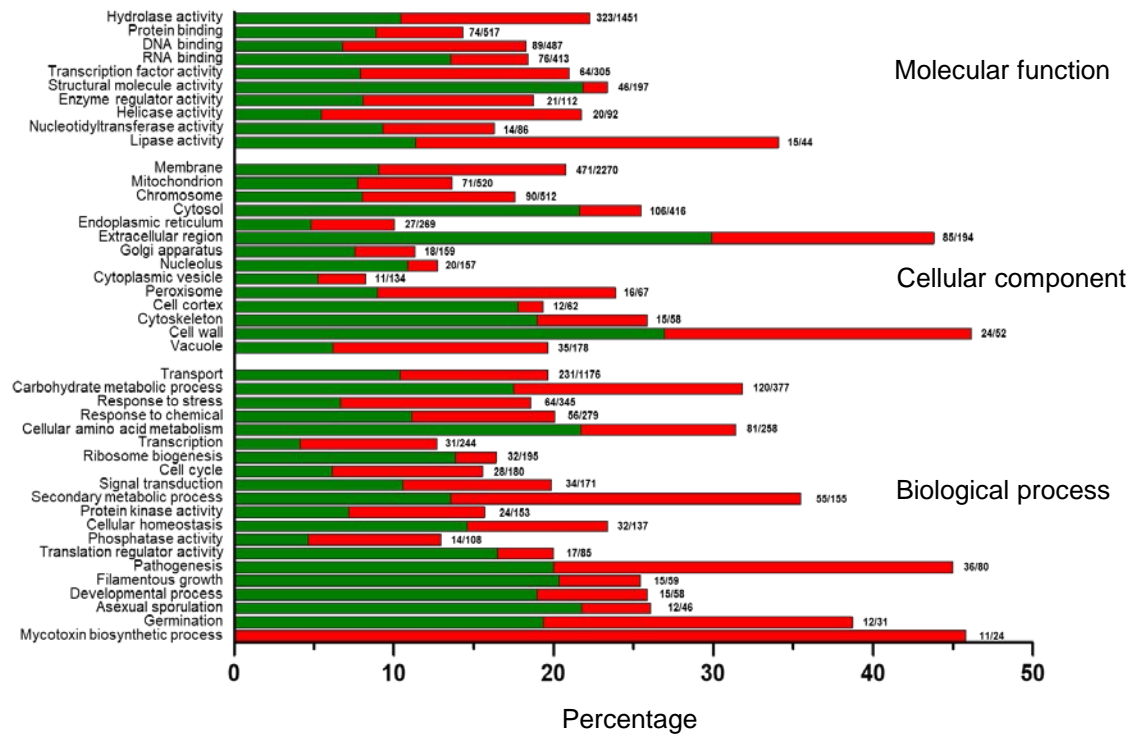

Supplement: mSphere.00998-20-sf001.pdf [file mSphere.00998-20-sf001.pdf]
